## CORRECTION

# Cooperative functions of the two F-BAR proteins Cip4 and Nostrin in the regulation of E-cadherin in epithelial morphogenesis

**Thomas Zobel, Klaus Brinkmann, Nicole Koch, Katharina Schneider, Eric Seemann, Astrid Fleige, Britta Qualmann, Michael M. Kessels and Sven Bogdan**

There was an error published in *J. Cell Sci.* **128**, 499–515.

On p. 507 of this article, the legend of Fig. 6 contained an incomplete description of panel B.

The correct sentence should read:

(B) Wild type stage 4 egg chamber stained for Armadillo and E-cadherin; arrowhead indicates apical E-cadherin localization in follicle cells.

We apologise to the readers for any confusion that this error might have caused.
